# Supplementary material
Source: PubMed Central journal article supplement (PMC11029701)
Supplement: 262_2014_1566_MOESM1_ESM.pdf [file 262_2014_1566_MOESM1_ESM.pdf]

**Supplemental Table 1** QoL: EORTC QLQ-C30

| EORTC QLQ-C30            | Baseline |              |        |       |        | Last visit |              |        |       |        | Change |               |        |         |        | P value  |
|--------------------------|----------|--------------|--------|-------|--------|------------|--------------|--------|-------|--------|--------|---------------|--------|---------|--------|----------|
|                          | n        | Mean ±SD     | Median | Min   | Max    | n          | Mean ±SD     | Median | Min   | Max    | n      | Mean ±SD      | Median | Min     | Max    |          |
| <b>ITT set, N=16</b>     |          |              |        |       |        |            |              |        |       |        |        |               |        |         |        |          |
| Global health status/QoL | 16       | 53.65 ±29.81 | 58.33  | 0.00  | 91.67  | 16         | 40.63 ±25.98 | 41.67  | 0.00  | 100.00 | 16     | -13.02 ±31.91 | -20.83 | -58.33  | 41.67  | 0.1234** |
| Functional scales        |          |              |        |       |        |            |              |        |       |        |        |               |        |         |        |          |
| Physical functioning     | 16       | 73.75 ±30.64 | 86.67  | 6.67  | 100.00 | 16         | 69.58 ±21.63 | 73.33  | 33.33 | 100.00 | 16     | -4.17 ±30.29  | -6.67  | -53.33  | 66.67  | 0.5903** |
| Role functioning         | 16       | 76.04 ±32.76 | 83.33  | 0.00  | 100.00 | 16         | 59.38 ±29.79 | 66.67  | 0.00  | 100.00 | 16     | -16.67 ±46.75 | -16.67 | -100.00 | 100.00 | 0.1743** |
| Emotional functioning    | 16       | 70.31 ±20.41 | 70.83  | 33.33 | 100.00 | 16         | 61.98 ±23.56 | 66.67  | 16.67 | 100.00 | 16     | -8.33 ±21.94  | -8.33  | -50.00  | 50.00  | 0.1495** |
| Cognitive functioning    | 16       | 71.88 ±24.13 | 66.67  | 16.67 | 100.00 | 16         | 68.75 ±28.46 | 75.00  | 16.67 | 100.00 | 16     | -3.13 ±27.36  | 0.00   | -50.00  | 50.00  | 0.6544** |
| Social functioning       | 16       | 68.75 ±20.97 | 66.67  | 33.33 | 100.00 | 16         | 55.21 ±27.02 | 58.33  | 0.00  | 100.00 | 16     | -13.54 ±30.56 | 0.00   | -66.67  | 33.33  | 0.0966** |
| Symptom scales           |          |              |        |       |        |            |              |        |       |        |        |               |        |         |        |          |
| Fatigue                  | 16       | 40.97 ±24.59 | 33.33  | 0.00  | 100.00 | 16         | 50.69 ±29.25 | 50.00  | 11.11 | 100.00 | 16     | 9.72 ±38.46   | 5.56   | -77.78  | 66.67  | 0.3280** |
| Nausea and vomiting      | 16       | 15.63 ±25.44 | 8.33   | 0.00  | 100.00 | 16         | 16.67 ±18.26 | 16.67  | 0.00  | 50.00  | 16     | 1.04 ±33.59   | 0.00   | -100.00 | 50.00  | 0.5273++ |
| Pain                     | 16       | 20.83 ±25.46 | 16.67  | 0.00  | 83.33  | 16         | 45.83 ±26.87 | 41.67  | 0.00  | 83.33  | 16     | 25.00 ±29.19  | 16.67  | -16.67  | 83.33  | 0.0038** |
| Dyspnea                  | 16       | 10.42 ±20.07 | 0.00   | 0.00  | 66.67  | 16         | 27.08 ±32.70 | 16.67  | 0.00  | 100.00 | 16     | 16.67 ±29.81  | 0.00   | -33.33  | 66.67  | 0.0781++ |
| Constipation             | 16       | 16.67 ±24.34 | 0.00   | 0.00  | 66.67  | 16         | 29.17 ±40.14 | 0.00   | 0.00  | 100.00 | 16     | 12.50 ±46.94  | 0.00   | -66.67  | 100.00 | 0.3037** |
| Diarrhea                 | 16       | 8.33 ±25.82  | 0.00   | 0.00  | 100.00 | 16         | 8.33 ±19.25  | 0.00   | 0.00  | 66.67  | 16     | 0.00 ±12.17   | 0.00   | -33.33  | 33.33  | 1.0000++ |
| Insomnia                 | 16       | 14.58 ±20.97 | 0.00   | 0.00  | 66.67  | 16         | 43.75 ±33.82 | 33.33  | 0.00  | 100.00 | 16     | 29.17 ±31.91  | 33.33  | 0.00    | 100.00 | 0.0020++ |
| Appetite loss            | 16       | 31.25 ±33.26 | 33.33  | 0.00  | 100.00 | 16         | 43.75 ±37.94 | 33.33  | 0.00  | 100.00 | 16     | 12.50 ±38.25  | 0.00   | -66.67  | 66.67  | 0.2108** |
| Financial difficulties   | 16       | 27.08 ±30.35 | 33.33  | 0.00  | 100.00 | 16         | 31.25 ±33.26 | 33.33  | 0.00  | 100.00 | 16     | 4.17 ±29.50   | 0.00   | -33.33  | 66.67  | 0.8711++ |
| <b>PP set, N=13</b>      |          |              |        |       |        |            |              |        |       |        |        |               |        |         |        |          |
| Global health status/QoL | 13       | 60.90 ±23.66 | 58.33  | 25.00 | 91.67  | 13         | 40.38 ±29.04 | 41.67  | 0.00  | 100.00 | 13     | -20.51 ±26.49 | -25.00 | -58.33  | 16.67  | 0.0163** |
| Functional scales        |          |              |        |       |        |            |              |        |       |        |        |               |        |         |        |          |
| Physical functioning     | 13       | 82.05 ±19.70 | 86.67  | 33.33 | 100.00 | 13         | 73.85 ±20.45 | 73.33  | 33.33 | 100.00 | 13     | -8.21 ±20.75  | -6.67  | -53.33  | 26.67  | 0.1795** |
| Role functioning         | 13       | 87.18 ±15.45 | 100.00 | 66.67 | 100.00 | 13         | 60.26 ±29.30 | 66.67  | 0.00  | 100.00 | 13     | -26.92 ±34.39 | -16.67 | -100.00 | 16.67  | 0.0154** |
| Emotional functioning    | 13       | 76.28 ±15.90 | 75.00  | 50.00 | 100.00 | 13         | 66.03 ±19.97 | 66.67  | 33.33 | 100.00 | 13     | -10.26 ±12.80 | -8.33  | -33.33  | 8.33   | 0.0136** |

|                        |    |       |        |       |       |        |    |       |        |       |       |        |    |        |        |        |        |        |          |
|------------------------|----|-------|--------|-------|-------|--------|----|-------|--------|-------|-------|--------|----|--------|--------|--------|--------|--------|----------|
| Cognitive functioning  | 13 | 78.21 | ±19.70 | 66.67 | 50.00 | 100.00 | 13 | 69.23 | ±28.74 | 83.33 | 16.67 | 100.00 | 13 | -8.97  | ±25.11 | -16.67 | -50.00 | 33.33  | 0.2218** |
| Social functioning     | 13 | 74.36 | ±17.50 | 66.67 | 33.33 | 100.00 | 13 | 56.41 | ±29.30 | 66.67 | 0.00  | 100.00 | 13 | -17.95 | ±29.24 | 0.00   | -66.67 | 16.67  | 0.0470** |
| Symptom scales         |    |       |        |       |       |        |    |       |        |       |       |        |    |        |        |        |        |        |          |
| Fatigue                | 13 | 35.04 | ±16.88 | 33.33 | 0.00  | 66.67  | 13 | 48.72 | ±29.24 | 44.44 | 11.11 | 100.00 | 13 | 13.68  | ±29.80 | 11.11  | -33.33 | 66.67  | 0.1239** |
| Nausea and vomiting    | 13 | 10.26 | ±12.80 | 0.00  | 0.00  | 33.33  | 13 | 15.38 | ±18.59 | 16.67 | 0.00  | 50.00  | 13 | 5.13   | ±20.84 | 0.00   | -16.67 | 50.00  | 0.4375++ |
| Pain                   | 13 | 19.23 | ±20.24 | 16.67 | 0.00  | 66.67  | 13 | 47.44 | ±26.22 | 33.33 | 0.00  | 83.33  | 13 | 28.21  | ±28.37 | 16.67  | 0.00   | 83.33  | 0.0039++ |
| Dyspnea                | 13 | 7.69  | ±14.62 | 0.00  | 0.00  | 33.33  | 13 | 23.08 | ±31.58 | 0.00  | 0.00  | 100.00 | 13 | 15.38  | ±29.24 | 0.00   | -33.33 | 66.67  | 0.1563++ |
| Constipation           | 13 | 12.82 | ±21.68 | 0.00  | 0.00  | 66.67  | 13 | 28.21 | ±38.12 | 0.00  | 0.00  | 100.00 | 13 | 15.38  | ±37.55 | 0.00   | -33.33 | 100.00 | 0.1654** |
| Diarrhea               | 13 | 10.26 | ±28.50 | 0.00  | 0.00  | 100.00 | 13 | 10.26 | ±21.01 | 0.00  | 0.00  | 66.67  | 13 | 0.00   | ±13.61 | 0.00   | -33.33 | 33.33  | 1.0000++ |
| Insomnia               | 13 | 15.38 | ±22.01 | 0.00  | 0.00  | 66.67  | 13 | 43.59 | ±31.58 | 33.33 | 0.00  | 100.00 | 13 | 28.21  | ±26.69 | 33.33  | 0.00   | 100.00 | 0.0039++ |
| Appetite loss          | 13 | 23.08 | ±28.50 | 0.00  | 0.00  | 66.67  | 13 | 41.03 | ±41.17 | 33.33 | 0.00  | 100.00 | 13 | 17.95  | ±35.00 | 0.00   | -33.33 | 66.67  | 0.0892** |
| Financial difficulties | 13 | 25.64 | ±30.89 | 33.33 | 0.00  | 100.00 | 13 | 28.21 | ±32.90 | 33.33 | 0.00  | 100.00 | 13 | 2.56   | ±31.80 | 0.00   | -33.33 | 66.67  | 0.7762** |

Change = Last visit – Baseline

\*\* : paired *t* test

++ : Wilcoxon signed rank test

QoL = quality of life; EORTC = European Organization for Research and Treatment of Cancer; QLQ-C30 = Quality of Life Questionnaire Core 30;

SD = standard deviation; Min, minimum; Max = maximum; ITT = intention-to-treat; PP = per-protocol.

**Supplemental Table 2** QoL: EORTC QLQ-PAN26

| EORTC QLQ-PAN26           | Baseline |              |        |       |        | Last visit |              |        |       |        | Change |               |        |         |        | P value  |
|---------------------------|----------|--------------|--------|-------|--------|------------|--------------|--------|-------|--------|--------|---------------|--------|---------|--------|----------|
|                           | n        | Mean ±SD     | Median | Min   | Max    | n          | Mean ±SD     | Median | Min   | Max    | n      | Mean ±SD      | Median | Min     | Max    |          |
| <b>ITT set, N=16</b>      |          |              |        |       |        |            |              |        |       |        |        |               |        |         |        |          |
| Pancreatic pain           | 16       | 77.08 ±23.07 | 83.33  | 16.67 | 100.00 | 16         | 60.42 ±25.91 | 58.33  | 33.33 | 100.00 | 16     | -16.67 ±23.37 | -20.83 | -66.67  | 16.67  | 0.0121** |
| Gastrointestinal          | 16       | 78.13 ±29.01 | 91.67  | 0.00  | 100.00 | 16         | 63.54 ±29.32 | 66.67  | 0.00  | 100.00 | 16     | -14.58 ±35.42 | -8.33  | -100.00 | 66.67  | 0.1204** |
| Jaundice                  | 16       | 93.75 ±11.98 | 100.00 | 66.67 | 100.00 | 16         | 87.50 ±16.67 | 100.00 | 50.00 | 100.00 | 16     | -6.25 ±15.96  | 0.00   | -50.00  | 16.67  | 0.1875++ |
| Body image                | 16       | 56.25 ±38.91 | 58.33  | 0.00  | 100.00 | 16         | 56.25 ±29.74 | 50.00  | 0.00  | 100.00 | 16     | 0.00 ±23.57   | 0.00   | -33.33  | 50.00  | 1.0000** |
| Altered bowel habit       | 16       | 79.17 ±24.72 | 83.33  | 16.67 | 100.00 | 16         | 61.46 ±24.13 | 66.67  | 16.67 | 100.00 | 16     | -17.71 ±19.69 | -16.67 | -50.00  | 16.67  | 0.0026** |
| Health satisfaction       | 16       | 35.42 ±24.25 | 33.33  | 0.00  | 100.00 | 16         | 34.38 ±27.53 | 33.33  | 0.00  | 83.33  | 16     | -1.04 ±31.31  | 0.00   | -100.00 | 33.33  | 0.5195++ |
| Sexuality scale           | 16       | 55.21 ±39.78 | 66.67  | 0.00  | 100.00 | 16         | 54.17 ±34.16 | 66.67  | 0.00  | 100.00 | 16     | -1.04 ±39.66  | 0.00   | -50.00  | 100.00 | 0.7578++ |
| Separate questions        |          |              |        |       |        |            |              |        |       |        |        |               |        |         |        |          |
| Bloated abdomen           | 16       | 35.42 ±25.73 | 33.33  | 0.00  | 66.67  | 16         | 54.17 ±34.16 | 66.67  | 0.00  | 100.00 | 16     | 18.75 ±27.13  | 16.67  | -33.33  | 66.67  | 0.0156++ |
| Taste changes             | 16       | 29.17 ±29.50 | 33.33  | 0.00  | 100.00 | 16         | 43.75 ±35.94 | 50.00  | 0.00  | 100.00 | 16     | 14.58 ±32.13  | 0.00   | -33.33  | 100.00 | 0.1563++ |
| Indigestion               | 16       | 27.08 ±34.89 | 16.67  | 0.00  | 100.00 | 16         | 41.67 ±31.03 | 33.33  | 0.00  | 100.00 | 16     | 14.58 ±43.83  | 0.00   | -66.67  | 100.00 | 0.2031** |
| Flatulence                | 16       | 20.83 ±23.96 | 16.67  | 0.00  | 66.67  | 16         | 33.33 ±32.20 | 33.33  | 0.00  | 100.00 | 16     | 12.50 ±31.91  | 0.00   | -33.33  | 66.67  | 0.1875++ |
| Weight loss               | 16       | 22.92 ±33.82 | 0.00   | 0.00  | 100.00 | 16         | 27.08 ±25.00 | 33.33  | 0.00  | 66.67  | 16     | 4.17 ±26.87   | 0.00   | -33.33  | 66.67  | 0.8281++ |
| Decreased muscle strength | 16       | 31.25 ±30.96 | 33.33  | 0.00  | 100.00 | 16         | 43.75 ±29.11 | 33.33  | 0.00  | 100.00 | 16     | 12.50 ±23.96  | 0.00   | -33.33  | 66.67  | 0.1094++ |
| Dry mouth                 | 16       | 25.00 ±31.03 | 16.67  | 0.00  | 100.00 | 16         | 45.83 ±34.16 | 33.33  | 0.00  | 100.00 | 16     | 20.83 ±43.67  | 33.33  | -100.00 | 100.00 | 0.0508++ |
| Treatment side effects    | 16       | 29.17 ±36.26 | 16.67  | 0.00  | 100.00 | 16         | 39.58 ±30.35 | 33.33  | 0.00  | 100.00 | 16     | 10.42 ±45.08  | 0.00   | -66.67  | 100.00 | 0.3700** |
| Fear for future health    | 16       | 52.08 ±29.74 | 33.33  | 0.00  | 100.00 | 16         | 58.33 ±19.25 | 66.67  | 33.33 | 100.00 | 16     | 6.25 ±32.70   | 0.00   | -66.67  | 66.67  | 0.4564** |
| Ability to plan ahead     | 16       | 31.25 ±33.26 | 33.33  | 0.00  | 100.00 | 16         | 52.08 ±27.13 | 66.67  | 0.00  | 100.00 | 16     | 20.83 ±36.26  | 33.33  | -66.67  | 66.67  | 0.0269++ |
| <b>PP set, N=13</b>       |          |              |        |       |        |            |              |        |       |        |        |               |        |         |        |          |
| Pancreatic pain           | 13       | 79.49 ±17.55 | 83.33  | 50.00 | 100.00 | 13         | 61.54 ±24.19 | 58.33  | 33.33 | 100.00 | 13     | -17.95 ±16.96 | -25.00 | -50.00  | 8.33   | 0.0025** |
| Gastrointestinal          | 13       | 84.62 ±19.79 | 100.00 | 50.00 | 100.00 | 13         | 65.38 ±32.25 | 66.67  | 0.00  | 100.00 | 13     | -19.23 ±29.54 | -16.67 | -100.00 | 16.67  | 0.0313++ |
| Jaundice                  | 13       | 96.15 ±9.99  | 100.00 | 66.67 | 100.00 | 13         | 88.46 ±17.19 | 100.00 | 50.00 | 100.00 | 13     | -7.69 ±16.12  | 0.00   | -50.00  | 0.00   | 0.2500++ |
| Body image                | 13       | 62.82 ±35.46 | 66.67  | 0.00  | 100.00 | 13         | 56.41 ±31.58 | 50.00  | 0.00  | 100.00 | 13     | -6.41 ±18.68  | 0.00   | -33.33  | 33.33  | 0.2397** |
| Altered bowel habit       | 13       | 80.77 ±25.32 | 83.33  | 16.67 | 100.00 | 13         | 65.38 ±20.93 | 66.67  | 33.33 | 100.00 | 13     | -15.38 ±19.79 | -16.67 | -50.00  | 16.67  | 0.0160** |

| EORTC QLQ-PAN26           | Baseline |              |        |      |        | Last visit |              |        |       |        | Change |               |        |         |        | P value  |
|---------------------------|----------|--------------|--------|------|--------|------------|--------------|--------|-------|--------|--------|---------------|--------|---------|--------|----------|
|                           | n        | Mean ±SD     | Median | Min  | Max    | n          | Mean ±SD     | Median | Min   | Max    | n      | Mean ±SD      | Median | Min     | Max    |          |
| Health satisfaction       | 13       | 34.62 ±26.75 | 33.33  | 0.00 | 100.00 | 13         | 30.77 ±27.09 | 33.33  | 0.00  | 83.33  | 13     | -3.85 ±32.74  | 0.00   | -100.00 | 33.33  | 1.0000++ |
| Sexuality scale           | 13       | 65.38 ±36.30 | 66.67  | 0.00 | 100.00 | 13         | 53.85 ±32.03 | 66.67  | 0.00  | 100.00 | 13     | -11.54 ±22.96 | 0.00   | -50.00  | 33.33  | 0.1563++ |
| Separate questions        |          |              |        |      |        |            |              |        |       |        |        |               |        |         |        |          |
| Bloated abdomen           | 13       | 33.33 ±23.57 | 33.33  | 0.00 | 66.67  | 13         | 53.85 ±37.36 | 66.67  | 0.00  | 100.00 | 13     | 20.51 ±21.68  | 33.33  | 0.00    | 66.67  | 0.0156++ |
| Taste changes             | 13       | 20.51 ±21.68 | 33.33  | 0.00 | 66.67  | 13         | 38.46 ±38.12 | 33.33  | 0.00  | 100.00 | 13     | 17.95 ±32.25  | 0.00   | 0.00    | 100.00 | 0.1250++ |
| Indigestion               | 13       | 23.08 ±31.58 | 0.00   | 0.00 | 100.00 | 13         | 38.46 ±32.90 | 33.33  | 0.00  | 100.00 | 13     | 15.38 ±39.94  | 0.00   | -66.67  | 100.00 | 0.2813++ |
| Flatulence                | 13       | 15.38 ±17.30 | 0.00   | 0.00 | 33.33  | 13         | 28.21 ±32.90 | 33.33  | 0.00  | 100.00 | 13     | 12.82 ±28.99  | 0.00   | -33.33  | 66.67  | 0.2500++ |
| Weight loss               | 13       | 10.26 ±16.01 | 0.00   | 0.00 | 33.33  | 13         | 23.08 ±21.01 | 33.33  | 0.00  | 66.67  | 13     | 12.82 ±21.68  | 0.00   | 0.00    | 66.67  | 0.1250++ |
| Decreased muscle strength | 13       | 23.08 ±25.04 | 33.33  | 0.00 | 66.67  | 13         | 38.46 ±29.96 | 33.33  | 0.00  | 100.00 | 13     | 15.38 ±22.01  | 0.00   | 0.00    | 66.67  | 0.0625++ |
| Dry mouth                 | 13       | 17.95 ±22.01 | 0.00   | 0.00 | 66.67  | 13         | 48.72 ±35.00 | 33.33  | 0.00  | 100.00 | 13     | 30.77 ±31.80  | 33.33  | 0.00    | 100.00 | 0.0078++ |
| Treatment side effects    | 13       | 17.95 ±25.88 | 0.00   | 0.00 | 66.67  | 13         | 38.46 ±32.90 | 33.33  | 0.00  | 100.00 | 13     | 20.51 ±37.36  | 0.00   | -33.33  | 100.00 | 0.1250++ |
| Fear for future health    | 13       | 46.15 ±28.99 | 33.33  | 0.00 | 100.00 | 13         | 58.97 ±19.97 | 66.67  | 33.33 | 100.00 | 13     | 12.82 ±28.99  | 0.00   | -33.33  | 66.67  | 0.1368** |
| Ability to plan ahead     | 13       | 23.08 ±21.01 | 33.33  | 0.00 | 66.67  | 13         | 51.28 ±29.24 | 66.67  | 0.00  | 100.00 | 13     | 28.21 ±22.96  | 33.33  | 0.00    | 66.67  | 0.0039++ |

Change = Last visit – Baseline

\*\* : paired *t* test

++ : Wilcoxon signed rank test

QoL = quality of life; EORTC = European Organization for Research and Treatment of Cancer; QLQ-PAN = Quality of Life Questionnaire in patients with pancreatic cancer;

SD = standard deviation; Min = minimum; Max = maximum; ITT = intention-to-treat; PP = per-protocol

**Supplemental Table 3** QoL at each visit: EORTC QLQ-C30

| EORTC QLQ-C30            | Visit    | n  | Mean $\pm$ SD     | Median | Min   | Max    |
|--------------------------|----------|----|-------------------|--------|-------|--------|
| <b>ITT set</b>           |          |    |                   |        |       |        |
| Global health status/QoL |          |    |                   |        |       |        |
|                          | baseline | 16 | 53.65 $\pm$ 29.81 | 58.33  | 0.00  | 91.67  |
|                          | week 4   | 15 | 51.11 $\pm$ 23.33 | 50.00  | 16.67 | 91.67  |
|                          | week 8   | 16 | 40.63 $\pm$ 24.88 | 41.67  | 0.00  | 91.67  |
|                          | week 12  | 4  | 60.42 $\pm$ 18.48 | 58.33  | 41.67 | 83.33  |
|                          | week 16  | 3  | 75.00 $\pm$ 25.00 | 75.00  | 50.00 | 100.00 |
| Functional scales        |          |    |                   |        |       |        |
| Physical functioning     |          |    |                   |        |       |        |
|                          | baseline | 16 | 73.75 $\pm$ 30.64 | 86.67  | 6.67  | 100.00 |
|                          | week 4   | 15 | 72.89 $\pm$ 21.89 | 73.33  | 26.67 | 100.00 |
|                          | week 8   | 16 | 70.83 $\pm$ 21.20 | 73.33  | 33.33 | 100.00 |
|                          | week 12  | 4  | 75.00 $\pm$ 27.42 | 80.00  | 40.00 | 100.00 |
|                          | week 16  | 3  | 82.22 $\pm$ 13.88 | 86.67  | 66.67 | 93.33  |
| Role functioning         |          |    |                   |        |       |        |
|                          | baseline | 16 | 76.04 $\pm$ 32.76 | 83.33  | 0.00  | 100.00 |
|                          | week 4   | 15 | 71.11 $\pm$ 31.79 | 83.33  | 0.00  | 100.00 |
|                          | week 8   | 16 | 61.46 $\pm$ 29.01 | 66.67  | 0.00  | 100.00 |
|                          | week 12  | 4  | 70.83 $\pm$ 28.46 | 75.00  | 33.33 | 100.00 |
|                          | week 16  | 3  | 83.33 $\pm$ 28.87 | 100.00 | 50.00 | 100.00 |
| Emotional functioning    |          |    |                   |        |       |        |
|                          | baseline | 16 | 70.31 $\pm$ 20.41 | 70.83  | 33.33 | 100.00 |
|                          | week 4   | 15 | 73.33 $\pm$ 20.94 | 75.00  | 33.33 | 100.00 |
|                          | week 8   | 16 | 62.50 $\pm$ 21.30 | 66.67  | 33.33 | 100.00 |
|                          | week 12  | 4  | 58.33 $\pm$ 28.05 | 70.83  | 16.67 | 75.00  |
|                          | week 16  | 3  | 72.22 $\pm$ 9.62  | 66.67  | 66.67 | 83.33  |
| Cognitive functioning    |          |    |                   |        |       |        |
|                          | baseline | 16 | 71.88 $\pm$ 24.13 | 66.67  | 16.67 | 100.00 |
|                          | week 4   | 15 | 80.00 $\pm$ 11.27 | 83.33  | 66.67 | 100.00 |
|                          | week 8   | 16 | 67.71 $\pm$ 28.20 | 66.67  | 16.67 | 100.00 |
|                          | week 12  | 4  | 79.17 $\pm$ 15.96 | 75.00  | 66.67 | 100.00 |
|                          | week 16  | 3  | 83.33 $\pm$ 16.67 | 83.33  | 66.67 | 100.00 |
| Social functioning       |          |    |                   |        |       |        |
|                          | baseline | 16 | 68.75 $\pm$ 20.97 | 66.67  | 33.33 | 100.00 |
|                          | week 4   | 15 | 67.78 $\pm$ 28.50 | 66.67  | 16.67 | 100.00 |
|                          | week 8   | 16 | 55.21 $\pm$ 26.33 | 66.67  | 0.00  | 100.00 |
|                          | week 12  | 4  | 75.00 $\pm$ 31.91 | 83.33  | 33.33 | 100.00 |
|                          | week 16  | 3  | 77.78 $\pm$ 25.46 | 83.33  | 50.00 | 100.00 |
| Symptom scales           |          |    |                   |        |       |        |
| Fatigue                  |          |    |                   |        |       |        |
|                          | baseline | 16 | 40.97 $\pm$ 24.59 | 33.33  | 0.00  | 100.00 |
|                          | week 4   | 15 | 37.78 $\pm$ 20.91 | 33.33  | 11.11 | 77.78  |
|                          | week 8   | 16 | 48.61 $\pm$ 27.48 | 50.00  | 11.11 | 100.00 |
|                          | week 12  | 4  | 44.44 $\pm$ 35.14 | 38.89  | 11.11 | 88.89  |
|                          | week 16  | 3  | 33.33 $\pm$ 29.40 | 22.22  | 11.11 | 66.67  |
| Nausea and vomiting      |          |    |                   |        |       |        |
|                          | baseline | 16 | 15.63 $\pm$ 25.44 | 8.33   | 0.00  | 100.00 |
|                          | week 4   | 15 | 8.89 $\pm$ 15.26  | 0.00   | 0.00  | 50.00  |
|                          | week 8   | 16 | 15.63 $\pm$ 17.71 | 16.67  | 0.00  | 50.00  |

| EORTC QLQ-C30            | Visit        | n        | Mean $\pm$ SD     | Median            | Min   | Max    |        |
|--------------------------|--------------|----------|-------------------|-------------------|-------|--------|--------|
| Pain                     | week 12      | 4        | 8.33 $\pm$ 16.67  | 0.00              | 0.00  | 33.33  |        |
|                          | week 16      | 3        | 5.56 $\pm$ 9.62   | 0.00              | 0.00  | 16.67  |        |
|                          | baseline     | 16       | 20.83 $\pm$ 25.46 | 16.67             | 0.00  | 83.33  |        |
|                          | week 4       | 15       | 30.00 $\pm$ 29.00 | 33.33             | 0.00  | 83.33  |        |
|                          | week 8       | 16       | 43.75 $\pm$ 25.73 | 33.33             | 0.00  | 83.33  |        |
|                          | week 12      | 4        | 33.33 $\pm$ 23.57 | 41.67             | 0.00  | 50.00  |        |
|                          | week 16      | 3        | 27.78 $\pm$ 34.69 | 16.67             | 0.00  | 66.67  |        |
|                          | Dyspnea      | baseline | 16                | 10.42 $\pm$ 20.07 | 0.00  | 0.00   | 66.67  |
|                          |              | week 4   | 15                | 13.33 $\pm$ 21.08 | 0.00  | 0.00   | 66.67  |
|                          |              | week 8   | 16                | 25.00 $\pm$ 31.03 | 16.67 | 0.00   | 100.00 |
|                          |              | week 12  | 4                 | 16.67 $\pm$ 33.33 | 0.00  | 0.00   | 66.67  |
|                          |              | week 16  | 3                 | 11.11 $\pm$ 19.25 | 0.00  | 0.00   | 33.33  |
|                          | Constipation | baseline | 16                | 16.67 $\pm$ 24.34 | 0.00  | 0.00   | 66.67  |
|                          |              | week 4   | 15                | 8.89 $\pm$ 19.79  | 0.00  | 0.00   | 66.67  |
|                          |              | week 8   | 16                | 22.92 $\pm$ 35.94 | 0.00  | 0.00   | 100.00 |
|                          |              | week 12  | 4                 | 25.00 $\pm$ 50.00 | 0.00  | 0.00   | 100.00 |
|                          |              | week 16  | 3                 | 0.00 $\pm$ 0.00   | 0.00  | 0.00   | 0.00   |
|                          | Diarrhea     | baseline | 16                | 8.33 $\pm$ 25.82  | 0.00  | 0.00   | 100.00 |
|                          |              | week 4   | 15                | 11.11 $\pm$ 24.12 | 0.00  | 0.00   | 66.67  |
|                          |              | week 8   | 16                | 8.33 $\pm$ 19.25  | 0.00  | 0.00   | 66.67  |
| week 12                  |              | 4        | 8.33 $\pm$ 16.67  | 0.00              | 0.00  | 33.33  |        |
| week 16                  |              | 3        | 11.11 $\pm$ 19.25 | 0.00              | 0.00  | 33.33  |        |
| Insomnia                 | baseline     | 16       | 14.58 $\pm$ 20.97 | 0.00              | 0.00  | 66.67  |        |
|                          | week 4       | 15       | 28.89 $\pm$ 30.52 | 33.33             | 0.00  | 100.00 |        |
|                          | week 8       | 16       | 39.58 $\pm$ 27.81 | 33.33             | 0.00  | 100.00 |        |
|                          | week 12      | 4        | 50.00 $\pm$ 43.03 | 50.00             | 0.00  | 100.00 |        |
|                          | week 16      | 3        | 22.22 $\pm$ 38.49 | 0.00              | 0.00  | 66.67  |        |
| Appetite loss            | baseline     | 16       | 31.25 $\pm$ 33.26 | 33.33             | 0.00  | 100.00 |        |
|                          | week 4       | 15       | 35.56 $\pm$ 34.43 | 33.33             | 0.00  | 100.00 |        |
|                          | week 8       | 16       | 41.67 $\pm$ 37.52 | 33.33             | 0.00  | 100.00 |        |
|                          | week 12      | 4        | 25.00 $\pm$ 31.91 | 16.67             | 0.00  | 66.67  |        |
|                          | week 16      | 3        | 11.11 $\pm$ 19.25 | 0.00              | 0.00  | 33.33  |        |
| Financial difficulties   | baseline     | 16       | 27.08 $\pm$ 30.35 | 33.33             | 0.00  | 100.00 |        |
|                          | week 4       | 15       | 40.00 $\pm$ 33.81 | 33.33             | 0.00  | 100.00 |        |
|                          | week 8       | 16       | 33.33 $\pm$ 34.43 | 33.33             | 0.00  | 100.00 |        |
|                          | week 12      | 4        | 41.67 $\pm$ 31.91 | 50.00             | 0.00  | 66.67  |        |
|                          | week 16      | 3        | 22.22 $\pm$ 19.25 | 33.33             | 0.00  | 33.33  |        |
| <b>PP set</b>            |              |          |                   |                   |       |        |        |
| Global health status/QoL | baseline     | 13       | 60.90 $\pm$ 23.66 | 58.33             | 25.00 | 91.67  |        |
|                          | week 4       | 12       | 52.78 $\pm$ 25.71 | 50.00             | 16.67 | 91.67  |        |
|                          | week 8       | 13       | 39.74 $\pm$ 27.67 | 41.67             | 0.00  | 91.67  |        |
|                          | week 12      | 3        | 66.67 $\pm$ 16.67 | 66.67             | 50.00 | 83.33  |        |
|                          | week 16      | 3        | 75.00 $\pm$ 25.00 | 75.00             | 50.00 | 100.00 |        |

| EORTC QLQ-C30                | Visit    | n  | Mean $\pm$ SD     | Median | Min   | Max    |
|------------------------------|----------|----|-------------------|--------|-------|--------|
| <b>Functional scales</b>     |          |    |                   |        |       |        |
| <b>Physical functioning</b>  |          |    |                   |        |       |        |
|                              | baseline | 13 | 82.05 $\pm$ 19.70 | 86.67  | 33.33 | 100.00 |
|                              | week 4   | 12 | 75.56 $\pm$ 20.95 | 76.67  | 26.67 | 100.00 |
|                              | week 8   | 13 | 73.33 $\pm$ 21.77 | 73.33  | 33.33 | 100.00 |
|                              | week 12  | 3  | 86.67 $\pm$ 17.64 | 93.33  | 66.67 | 100.00 |
|                              | week 16  | 3  | 82.22 $\pm$ 13.88 | 86.67  | 66.67 | 93.33  |
| <b>Role functioning</b>      |          |    |                   |        |       |        |
|                              | baseline | 13 | 87.18 $\pm$ 15.45 | 100.00 | 66.67 | 100.00 |
|                              | week 4   | 12 | 75.00 $\pm$ 27.06 | 83.33  | 16.67 | 100.00 |
|                              | week 8   | 13 | 60.26 $\pm$ 29.30 | 66.67  | 0.00  | 100.00 |
|                              | week 12  | 3  | 83.33 $\pm$ 16.67 | 83.33  | 66.67 | 100.00 |
|                              | week 16  | 3  | 83.33 $\pm$ 28.87 | 100.00 | 50.00 | 100.00 |
| <b>Emotional functioning</b> |          |    |                   |        |       |        |
|                              | baseline | 13 | 76.28 $\pm$ 15.90 | 75.00  | 50.00 | 100.00 |
|                              | week 4   | 12 | 72.92 $\pm$ 22.79 | 79.17  | 33.33 | 100.00 |
|                              | week 8   | 13 | 65.38 $\pm$ 19.50 | 66.67  | 33.33 | 100.00 |
|                              | week 12  | 3  | 72.22 $\pm$ 4.81  | 75.00  | 66.67 | 75.00  |
|                              | week 16  | 3  | 72.22 $\pm$ 9.62  | 66.67  | 66.67 | 83.33  |
| <b>Cognitive functioning</b> |          |    |                   |        |       |        |
|                              | baseline | 13 | 78.21 $\pm$ 19.70 | 66.67  | 50.00 | 100.00 |
|                              | week 4   | 12 | 80.56 $\pm$ 11.96 | 83.33  | 66.67 | 100.00 |
|                              | week 8   | 13 | 67.95 $\pm$ 28.43 | 66.67  | 16.67 | 100.00 |
|                              | week 12  | 3  | 83.33 $\pm$ 16.67 | 83.33  | 66.67 | 100.00 |
|                              | week 16  | 3  | 83.33 $\pm$ 16.67 | 83.33  | 66.67 | 100.00 |
| <b>Social functioning</b>    |          |    |                   |        |       |        |
|                              | baseline | 13 | 74.36 $\pm$ 17.50 | 66.67  | 33.33 | 100.00 |
|                              | week 4   | 12 | 72.22 $\pm$ 29.59 | 75.00  | 16.67 | 100.00 |
|                              | week 8   | 13 | 53.85 $\pm$ 28.99 | 66.67  | 0.00  | 100.00 |
|                              | week 12  | 3  | 88.89 $\pm$ 19.25 | 100.00 | 66.67 | 100.00 |
|                              | week 16  | 3  | 77.78 $\pm$ 25.46 | 83.33  | 50.00 | 100.00 |
| <b>Symptom scales</b>        |          |    |                   |        |       |        |
| <b>Fatigue</b>               |          |    |                   |        |       |        |
|                              | baseline | 13 | 35.04 $\pm$ 16.88 | 33.33  | 0.00  | 66.67  |
|                              | week 4   | 12 | 32.41 $\pm$ 17.38 | 27.78  | 11.11 | 66.67  |
|                              | week 8   | 13 | 47.86 $\pm$ 28.83 | 44.44  | 11.11 | 100.00 |
|                              | week 12  | 3  | 29.63 $\pm$ 23.13 | 22.22  | 11.11 | 55.56  |
|                              | week 16  | 3  | 33.33 $\pm$ 29.40 | 22.22  | 11.11 | 66.67  |
| <b>Nausea and vomiting</b>   |          |    |                   |        |       |        |
|                              | baseline | 13 | 10.26 $\pm$ 12.80 | 0.00   | 0.00  | 33.33  |
|                              | week 4   | 12 | 8.33 $\pm$ 15.08  | 0.00   | 0.00  | 50.00  |
|                              | week 8   | 13 | 15.38 $\pm$ 18.59 | 16.67  | 0.00  | 50.00  |
|                              | week 12  | 3  | 0.00 $\pm$ 0.00   | 0.00   | 0.00  | 0.00   |
|                              | week 16  | 3  | 5.56 $\pm$ 9.62   | 0.00   | 0.00  | 16.67  |
| <b>Pain</b>                  |          |    |                   |        |       |        |
|                              | baseline | 13 | 19.23 $\pm$ 20.24 | 16.67  | 0.00  | 66.67  |
|                              | week 4   | 12 | 31.94 $\pm$ 27.94 | 33.33  | 0.00  | 83.33  |
|                              | week 8   | 13 | 46.15 $\pm$ 24.68 | 33.33  | 0.00  | 83.33  |
|                              | week 12  | 3  | 27.78 $\pm$ 25.46 | 33.33  | 0.00  | 50.00  |
|                              | week 16  | 3  | 27.78 $\pm$ 34.69 | 16.67  | 0.00  | 66.67  |
| <b>Dyspnea</b>               |          |    |                   |        |       |        |

| EORTC QLQ-C30          | Visit    | n  | Mean $\pm$ SD     | Median | Min   | Max    |
|------------------------|----------|----|-------------------|--------|-------|--------|
| Constipation           | baseline | 13 | 7.69 $\pm$ 14.62  | 0.00   | 0.00  | 33.33  |
|                        | week 4   | 12 | 11.11 $\pm$ 21.71 | 0.00   | 0.00  | 66.67  |
|                        | week 8   | 13 | 23.08 $\pm$ 31.58 | 0.00   | 0.00  | 100.00 |
|                        | week 12  | 3  | 0.00 $\pm$ 0.00   | 0.00   | 0.00  | 0.00   |
|                        | week 16  | 3  | 11.11 $\pm$ 19.25 | 0.00   | 0.00  | 33.33  |
| Diarrhea               | baseline | 13 | 12.82 $\pm$ 21.68 | 0.00   | 0.00  | 66.67  |
|                        | week 4   | 12 | 11.11 $\pm$ 21.71 | 0.00   | 0.00  | 66.67  |
|                        | week 8   | 13 | 28.21 $\pm$ 38.12 | 0.00   | 0.00  | 100.00 |
|                        | week 12  | 3  | 0.00 $\pm$ 0.00   | 0.00   | 0.00  | 0.00   |
|                        | week 16  | 3  | 0.00 $\pm$ 0.00   | 0.00   | 0.00  | 0.00   |
| Insomnia               | baseline | 13 | 10.26 $\pm$ 28.50 | 0.00   | 0.00  | 100.00 |
|                        | week 4   | 12 | 13.89 $\pm$ 26.43 | 0.00   | 0.00  | 66.67  |
|                        | week 8   | 13 | 7.69 $\pm$ 19.97  | 0.00   | 0.00  | 66.67  |
|                        | week 12  | 3  | 11.11 $\pm$ 19.25 | 0.00   | 0.00  | 33.33  |
|                        | week 16  | 3  | 11.11 $\pm$ 19.25 | 0.00   | 0.00  | 33.33  |
| Appetite loss          | baseline | 13 | 15.38 $\pm$ 22.01 | 0.00   | 0.00  | 66.67  |
|                        | week 4   | 12 | 27.78 $\pm$ 31.25 | 33.33  | 0.00  | 100.00 |
|                        | week 8   | 13 | 43.59 $\pm$ 28.50 | 33.33  | 0.00  | 100.00 |
|                        | week 12  | 3  | 33.33 $\pm$ 33.33 | 33.33  | 0.00  | 66.67  |
|                        | week 16  | 3  | 22.22 $\pm$ 38.49 | 0.00   | 0.00  | 66.67  |
| Financial difficulties | baseline | 13 | 23.08 $\pm$ 28.50 | 0.00   | 0.00  | 66.67  |
|                        | week 4   | 12 | 30.56 $\pm$ 36.12 | 16.67  | 0.00  | 100.00 |
|                        | week 8   | 13 | 41.03 $\pm$ 41.17 | 33.33  | 0.00  | 100.00 |
|                        | week 12  | 3  | 11.11 $\pm$ 19.25 | 0.00   | 0.00  | 33.33  |
|                        | week 16  | 3  | 11.11 $\pm$ 19.25 | 0.00   | 0.00  | 33.33  |
| Financial difficulties | baseline | 13 | 25.64 $\pm$ 30.89 | 33.33  | 0.00  | 100.00 |
|                        | week 4   | 12 | 38.89 $\pm$ 34.33 | 33.33  | 0.00  | 100.00 |
|                        | week 8   | 13 | 30.77 $\pm$ 34.59 | 33.33  | 0.00  | 100.00 |
|                        | week 12  | 3  | 55.56 $\pm$ 19.25 | 66.67  | 33.33 | 66.67  |
|                        | week 16  | 3  | 22.22 $\pm$ 19.25 | 33.33  | 0.00  | 33.33  |

QoL = quality of life; EORTC = European Organization for Research and Treatment of Cancer, QLQ-C30 = Quality of Life Questionnaire Core 30; ITT = intention-to-treat; PP = per-protocol.



**Supplemental Table 4** QoL at each visit: EORTC QLQ-PAN26

| EORTC QLQ-PAN26           | visit            | n  | Mean $\pm$ SD     | Median | Min   | Max    |
|---------------------------|------------------|----|-------------------|--------|-------|--------|
| <b>ITT set</b>            |                  |    |                   |        |       |        |
| Pancreatic pain           | baseline         | 16 | 77.08 $\pm$ 23.07 | 83.33  | 16.67 | 100.00 |
|                           | week 4           | 15 | 66.67 $\pm$ 26.73 | 75.00  | 25.00 | 100.00 |
|                           | week 8           | 16 | 59.90 $\pm$ 22.82 | 62.50  | 33.33 | 100.00 |
|                           | week 12          | 4  | 64.58 $\pm$ 24.88 | 66.67  | 33.33 | 91.67  |
|                           | week 16          | 3  | 80.56 $\pm$ 33.68 | 100.00 | 41.67 | 100.00 |
| Gastrointestinal distress |                  |    | —                 |        |       |        |
|                           | baseline         | 16 | 78.13 $\pm$ 29.01 | 91.67  | 0.00  | 100.00 |
|                           | week 4           | 15 | 78.89 $\pm$ 21.33 | 83.33  | 33.33 | 100.00 |
|                           | week 8           | 16 | 69.79 $\pm$ 29.95 | 66.67  | 0.00  | 100.00 |
|                           | week 12          | 4  | 79.17 $\pm$ 25.00 | 83.33  | 50.00 | 100.00 |
|                           | week 16          | 3  | 72.22 $\pm$ 34.69 | 83.33  | 33.33 | 100.00 |
| Jaundice                  | baseline         | 16 | 93.75 $\pm$ 11.98 | 100.00 | 66.67 | 100.00 |
|                           | week 4           | 15 | 92.22 $\pm$ 12.39 | 100.00 | 66.67 | 100.00 |
|                           | week 8           | 16 | 87.50 $\pm$ 15.52 | 91.67  | 50.00 | 100.00 |
|                           | week 12          | 4  | 95.83 $\pm$ 8.33  | 100.00 | 83.33 | 100.00 |
|                           | week 16          | 3  | 88.89 $\pm$ 19.25 | 100.00 | 66.67 | 100.00 |
| Body image alterations    | baseline         | 16 | 56.25 $\pm$ 38.91 | 58.33  | 0.00  | 100.00 |
|                           | week 4           | 15 | 65.56 $\pm$ 33.61 | 66.67  | 0.00  | 100.00 |
|                           | week 8           | 16 | 55.21 $\pm$ 29.01 | 50.00  | 0.00  | 100.00 |
|                           | week 12          | 4  | 83.33 $\pm$ 13.61 | 83.33  | 66.67 | 100.00 |
|                           | week 16          | 3  | 77.78 $\pm$ 25.46 | 83.33  | 50.00 | 100.00 |
| Altered bowel habits      | baseline         | 16 | 79.17 $\pm$ 24.72 | 83.33  | 16.67 | 100.00 |
|                           | week 4           | 15 | 78.89 $\pm$ 23.12 | 83.33  | 33.33 | 100.00 |
|                           | week 8           | 16 | 62.50 $\pm$ 27.55 | 66.67  | 16.67 | 100.00 |
|                           | week 12          | 4  | 62.50 $\pm$ 31.55 | 75.00  | 16.67 | 83.33  |
|                           | week 16          | 3  | 55.56 $\pm$ 19.25 | 66.67  | 33.33 | 66.67  |
| Health satisfaction       | baseline         | 16 | 35.42 $\pm$ 24.25 | 33.33  | 0.00  | 100.00 |
|                           | week 4           | 15 | 54.44 $\pm$ 24.77 | 50.00  | 16.67 | 100.00 |
|                           | week 8           | 16 | 47.92 $\pm$ 32.13 | 41.67  | 0.00  | 100.00 |
|                           | week 12          | 4  | 41.67 $\pm$ 44.10 | 33.33  | 0.00  | 100.00 |
|                           | week 16          | 3  | 16.67 $\pm$ 16.67 | 16.67  | 0.00  | 33.33  |
| Sexuality scale           | baseline         | 16 | 55.21 $\pm$ 39.78 | 66.67  | 0.00  | 100.00 |
|                           | week 4           | 15 | 58.89 $\pm$ 30.12 | 66.67  | 0.00  | 100.00 |
|                           | week 8           | 16 | 56.25 $\pm$ 35.94 | 66.67  | 0.00  | 100.00 |
|                           | week 12          | 4  | 62.50 $\pm$ 43.83 | 75.00  | 0.00  | 100.00 |
|                           | week 16          | 3  | 66.67 $\pm$ 33.33 | 66.67  | 33.33 | 100.00 |
| Separate questions        |                  |    |                   |        |       |        |
|                           | Bloating abdomen |    |                   |        |       |        |
|                           | baseline         | 16 | 35.42 $\pm$ 25.73 | 33.33  | 0.00  | 66.67  |
|                           | week 4           | 15 | 37.78 $\pm$ 33.01 | 33.33  | 0.00  | 100.00 |
|                           | week 8           | 16 | 54.17 $\pm$ 31.91 | 66.67  | 0.00  | 100.00 |

| EORTC QLQ-PAN26           | visit    | n  | Mean $\pm$ SD     | Median | Min   | Max    |
|---------------------------|----------|----|-------------------|--------|-------|--------|
|                           | week 12  | 4  | 41.67 $\pm$ 31.91 | 50.00  | 0.00  | 66.67  |
|                           | week 16  | 3  | 22.22 $\pm$ 38.49 | 0.00   | 0.00  | 66.67  |
| Taste changes             | baseline | 16 | 29.17 $\pm$ 29.50 | 33.33  | 0.00  | 100.00 |
|                           | week 4   | 15 | 31.11 $\pm$ 34.43 | 33.33  | 0.00  | 100.00 |
|                           | week 8   | 16 | 41.67 $\pm$ 35.49 | 33.33  | 0.00  | 100.00 |
|                           | week 12  | 4  | 25.00 $\pm$ 31.91 | 16.67  | 0.00  | 66.67  |
|                           | week 16  | 3  | 22.22 $\pm$ 38.49 | 0.00   | 0.00  | 66.67  |
| Indigestion               | baseline | 16 | 27.08 $\pm$ 34.89 | 16.67  | 0.00  | 100.00 |
|                           | week 4   | 15 | 24.44 $\pm$ 26.63 | 33.33  | 0.00  | 66.67  |
|                           | week 8   | 16 | 39.58 $\pm$ 30.35 | 33.33  | 0.00  | 100.00 |
|                           | week 12  | 4  | 33.33 $\pm$ 27.22 | 33.33  | 0.00  | 66.67  |
|                           | week 16  | 3  | 22.22 $\pm$ 38.49 | 0.00   | 0.00  | 66.67  |
| Flatulence                | baseline | 16 | 20.83 $\pm$ 23.96 | 16.67  | 0.00  | 66.67  |
|                           | week 4   | 15 | 17.78 $\pm$ 21.33 | 0.00   | 0.00  | 66.67  |
|                           | week 8   | 16 | 31.25 $\pm$ 30.96 | 33.33  | 0.00  | 100.00 |
|                           | week 12  | 4  | 25.00 $\pm$ 31.91 | 16.67  | 0.00  | 66.67  |
|                           | week 16  | 3  | 11.11 $\pm$ 19.25 | 0.00   | 0.00  | 33.33  |
| Weight loss               | baseline | 16 | 22.92 $\pm$ 33.82 | 0.00   | 0.00  | 100.00 |
|                           | week 4   | 15 | 26.67 $\pm$ 31.37 | 33.33  | 0.00  | 100.00 |
|                           | week 8   | 16 | 29.17 $\pm$ 23.96 | 33.33  | 0.00  | 66.67  |
|                           | week 12  | 4  | 8.33 $\pm$ 16.67  | 0.00   | 0.00  | 33.33  |
|                           | week 16  | 3  | 11.11 $\pm$ 19.25 | 0.00   | 0.00  | 33.33  |
| Decreased muscle strength | baseline | 16 | 31.25 $\pm$ 30.96 | 33.33  | 0.00  | 100.00 |
|                           | week 4   | 15 | 33.33 $\pm$ 25.20 | 33.33  | 0.00  | 66.67  |
|                           | week 8   | 16 | 43.75 $\pm$ 26.44 | 33.33  | 0.00  | 100.00 |
|                           | week 12  | 4  | 33.33 $\pm$ 27.22 | 33.33  | 0.00  | 66.67  |
|                           | week 16  | 3  | 11.11 $\pm$ 19.25 | 0.00   | 0.00  | 33.33  |
| Dry mouth                 | baseline | 16 | 25.00 $\pm$ 31.03 | 16.67  | 0.00  | 100.00 |
|                           | week 4   | 15 | 31.11 $\pm$ 29.46 | 33.33  | 0.00  | 100.00 |
|                           | week 8   | 16 | 43.75 $\pm$ 35.94 | 33.33  | 0.00  | 100.00 |
|                           | week 12  | 4  | 16.67 $\pm$ 19.25 | 16.67  | 0.00  | 33.33  |
|                           | week 16  | 3  | 22.22 $\pm$ 19.25 | 33.33  | 0.00  | 33.33  |
| Treatment side effects    | baseline | 16 | 29.17 $\pm$ 36.26 | 16.67  | 0.00  | 100.00 |
|                           | week 4   | 15 | 26.67 $\pm$ 25.82 | 33.33  | 0.00  | 66.67  |
|                           | week 8   | 16 | 35.42 $\pm$ 30.96 | 33.33  | 0.00  | 100.00 |
|                           | week 12  | 4  | 33.33 $\pm$ 27.22 | 33.33  | 0.00  | 66.67  |
|                           | week 16  | 3  | 22.22 $\pm$ 19.25 | 33.33  | 0.00  | 33.33  |
| Fear for future health    | baseline | 16 | 52.08 $\pm$ 29.74 | 33.33  | 0.00  | 100.00 |
|                           | week 4   | 15 | 51.11 $\pm$ 35.34 | 66.67  | 0.00  | 100.00 |
|                           | week 8   | 16 | 58.33 $\pm$ 19.25 | 66.67  | 33.33 | 100.00 |
|                           | week 12  | 4  | 50.00 $\pm$ 19.25 | 50.00  | 33.33 | 66.67  |
|                           | week 16  | 3  | 44.44 $\pm$ 19.25 | 33.33  | 33.33 | 66.67  |
| Ability to plan ahead     |          |    |                   |        |       |        |

| EORTC QLQ-PAN26           | visit           | n  | Mean $\pm$ SD     | Median | Min   | Max    |
|---------------------------|-----------------|----|-------------------|--------|-------|--------|
|                           | baseline        | 16 | 31.25 $\pm$ 33.26 | 33.33  | 0.00  | 100.00 |
|                           | week 4          | 15 | 26.67 $\pm$ 25.82 | 33.33  | 0.00  | 66.67  |
|                           | week 8          | 16 | 50.00 $\pm$ 29.81 | 66.67  | 0.00  | 100.00 |
|                           | week 12         | 4  | 33.33 $\pm$ 27.22 | 33.33  | 0.00  | 66.67  |
|                           | week 16         | 3  | 33.33 $\pm$ 33.33 | 33.33  | 0.00  | 66.67  |
| <b>PP set</b>             |                 |    |                   |        |       |        |
| Pancreatic pain           | baseline        | 13 | 79.49 $\pm$ 17.55 | 83.33  | 50.00 | 100.00 |
|                           | week 4          | 12 | 66.67 $\pm$ 25.87 | 70.83  | 25.00 | 100.00 |
|                           | week 8          | 13 | 60.90 $\pm$ 19.95 | 66.67  | 33.33 | 91.67  |
|                           | week 12         | 3  | 75.00 $\pm$ 16.67 | 75.00  | 58.33 | 91.67  |
|                           | week 16         | 3  | 80.56 $\pm$ 33.68 | 100.00 | 41.67 | 100.00 |
| Gastrointestinal distress | baseline        | 13 | 84.62 $\pm$ 19.79 | 100.00 | 50.00 | 100.00 |
|                           | week 4          | 12 | 81.94 $\pm$ 18.06 | 83.33  | 50.00 | 100.00 |
|                           | week 8          | 13 | 69.23 $\pm$ 31.80 | 66.67  | 0.00  | 100.00 |
|                           | week 12         | 3  | 88.89 $\pm$ 19.25 | 100.00 | 66.67 | 100.00 |
|                           | week 16         | 3  | 72.22 $\pm$ 34.69 | 83.33  | 33.33 | 100.00 |
| Jaundice                  | baseline        | 13 | 96.15 $\pm$ 9.99  | 100.00 | 66.67 | 100.00 |
|                           | week 4          | 12 | 91.67 $\pm$ 13.30 | 100.00 | 66.67 | 100.00 |
|                           | week 8          | 13 | 89.74 $\pm$ 16.01 | 100.00 | 50.00 | 100.00 |
|                           | week 12         | 3  | 94.44 $\pm$ 9.62  | 100.00 | 83.33 | 100.00 |
|                           | week 16         | 3  | 88.89 $\pm$ 19.25 | 100.00 | 66.67 | 100.00 |
| Body image alterations    | baseline        | 13 | 62.82 $\pm$ 35.46 | 66.67  | 0.00  | 100.00 |
|                           | week 4          | 12 | 65.28 $\pm$ 35.86 | 66.67  | 0.00  | 100.00 |
|                           | week 8          | 13 | 56.41 $\pm$ 31.58 | 50.00  | 0.00  | 100.00 |
|                           | week 12         | 3  | 83.33 $\pm$ 16.67 | 83.33  | 66.67 | 100.00 |
|                           | week 16         | 3  | 77.78 $\pm$ 25.46 | 83.33  | 50.00 | 100.00 |
| Altered bowel habits      | baseline        | 13 | 80.77 $\pm$ 25.32 | 83.33  | 16.67 | 100.00 |
|                           | week 4          | 12 | 77.78 $\pm$ 22.84 | 83.33  | 33.33 | 100.00 |
|                           | week 8          | 13 | 66.67 $\pm$ 25.46 | 66.67  | 16.67 | 100.00 |
|                           | week 12         | 3  | 77.78 $\pm$ 9.62  | 83.33  | 66.67 | 83.33  |
|                           | week 16         | 3  | 55.56 $\pm$ 19.25 | 66.67  | 33.33 | 66.67  |
| Health satisfaction       | baseline        | 13 | 34.62 $\pm$ 26.75 | 33.33  | 0.00  | 100.00 |
|                           | week 4          | 12 | 54.17 $\pm$ 26.71 | 50.00  | 16.67 | 100.00 |
|                           | week 8          | 13 | 46.15 $\pm$ 34.80 | 33.33  | 0.00  | 100.00 |
|                           | week 12         | 3  | 50.00 $\pm$ 50.00 | 50.00  | 0.00  | 100.00 |
|                           | week 16         | 3  | 16.67 $\pm$ 16.67 | 16.67  | 0.00  | 33.33  |
| Sexuality scale           | baseline        | 13 | 65.38 $\pm$ 36.30 | 66.67  | 0.00  | 100.00 |
|                           | week 4          | 12 | 54.17 $\pm$ 27.64 | 66.67  | 0.00  | 100.00 |
|                           | week 8          | 13 | 56.41 $\pm$ 34.39 | 66.67  | 0.00  | 100.00 |
|                           | week 12         | 3  | 83.33 $\pm$ 16.67 | 83.33  | 66.67 | 100.00 |
|                           | week 16         | 3  | 66.67 $\pm$ 33.33 | 66.67  | 33.33 | 100.00 |
| Separate questions        |                 |    |                   |        |       |        |
|                           | Bloated abdomen |    |                   |        |       |        |
|                           | baseline        | 13 | 33.33 $\pm$ 23.57 | 33.33  | 0.00  | 66.67  |

| EORTC QLQ-PAN26           | visit    | n  | Mean $\pm$ SD     | Median | Min   | Max    |
|---------------------------|----------|----|-------------------|--------|-------|--------|
|                           | week 4   | 12 | 38.89 $\pm$ 34.33 | 33.33  | 0.00  | 100.00 |
|                           | week 8   | 13 | 56.41 $\pm$ 34.39 | 66.67  | 0.00  | 100.00 |
|                           | week 12  | 3  | 33.33 $\pm$ 33.33 | 33.33  | 0.00  | 66.67  |
|                           | week 16  | 3  | 22.22 $\pm$ 38.49 | 0.00   | 0.00  | 66.67  |
| Taste changes             |          |    |                   |        |       |        |
|                           | baseline | 13 | 20.51 $\pm$ 21.68 | 33.33  | 0.00  | 66.67  |
|                           | week 4   | 12 | 27.78 $\pm$ 37.15 | 16.67  | 0.00  | 100.00 |
|                           | week 8   | 13 | 35.90 $\pm$ 37.17 | 33.33  | 0.00  | 100.00 |
|                           | week 12  | 3  | 11.11 $\pm$ 19.25 | 0.00   | 0.00  | 33.33  |
|                           | week 16  | 3  | 22.22 $\pm$ 38.49 | 0.00   | 0.00  | 66.67  |
| Indigestion               |          |    |                   |        |       |        |
|                           | baseline | 13 | 23.08 $\pm$ 31.58 | 0.00   | 0.00  | 100.00 |
|                           | week 4   | 12 | 25.00 $\pm$ 28.87 | 16.67  | 0.00  | 66.67  |
|                           | week 8   | 13 | 38.46 $\pm$ 32.90 | 33.33  | 0.00  | 100.00 |
|                           | week 12  | 3  | 22.22 $\pm$ 19.25 | 33.33  | 0.00  | 33.33  |
|                           | week 16  | 3  | 22.22 $\pm$ 38.49 | 0.00   | 0.00  | 66.67  |
| Flatulence                |          |    |                   |        |       |        |
|                           | baseline | 13 | 15.38 $\pm$ 17.30 | 0.00   | 0.00  | 33.33  |
|                           | week 4   | 12 | 16.67 $\pm$ 17.41 | 16.67  | 0.00  | 33.33  |
|                           | week 8   | 13 | 28.21 $\pm$ 32.90 | 33.33  | 0.00  | 100.00 |
|                           | week 12  | 3  | 11.11 $\pm$ 19.25 | 0.00   | 0.00  | 33.33  |
|                           | week 16  | 3  | 11.11 $\pm$ 19.25 | 0.00   | 0.00  | 33.33  |
| Weight loss               |          |    |                   |        |       |        |
|                           | baseline | 13 | 10.26 $\pm$ 16.01 | 0.00   | 0.00  | 33.33  |
|                           | week 4   | 12 | 22.22 $\pm$ 29.59 | 16.67  | 0.00  | 100.00 |
|                           | week 8   | 13 | 23.08 $\pm$ 21.01 | 33.33  | 0.00  | 66.67  |
|                           | week 12  | 3  | 11.11 $\pm$ 19.25 | 0.00   | 0.00  | 33.33  |
|                           | week 16  | 3  | 11.11 $\pm$ 19.25 | 0.00   | 0.00  | 33.33  |
| Decreased muscle strength |          |    |                   |        |       |        |
|                           | baseline | 13 | 23.08 $\pm$ 25.04 | 33.33  | 0.00  | 66.67  |
|                           | week 4   | 12 | 27.78 $\pm$ 23.92 | 33.33  | 0.00  | 66.67  |
|                           | week 8   | 13 | 41.03 $\pm$ 27.74 | 33.33  | 0.00  | 100.00 |
|                           | week 12  | 3  | 22.22 $\pm$ 19.25 | 33.33  | 0.00  | 33.33  |
|                           | week 16  | 3  | 11.11 $\pm$ 19.25 | 0.00   | 0.00  | 33.33  |
| Dry mouth                 |          |    |                   |        |       |        |
|                           | Baseline | 13 | 17.95 $\pm$ 22.01 | 0.00   | 0.00  | 66.67  |
|                           | week 4   | 12 | 36.11 $\pm$ 30.01 | 33.33  | 0.00  | 100.00 |
|                           | week 8   | 13 | 46.15 $\pm$ 37.36 | 33.33  | 0.00  | 100.00 |
|                           | week 12  | 3  | 11.11 $\pm$ 19.25 | 0.00   | 0.00  | 33.33  |
|                           | week 16  | 3  | 22.22 $\pm$ 19.25 | 33.33  | 0.00  | 33.33  |
| Treatment side effects    |          |    |                   |        |       |        |
|                           | baseline | 13 | 17.95 $\pm$ 25.88 | 0.00   | 0.00  | 66.67  |
|                           | week 4   | 12 | 30.56 $\pm$ 26.43 | 33.33  | 0.00  | 66.67  |
|                           | week 8   | 13 | 35.90 $\pm$ 34.59 | 33.33  | 0.00  | 100.00 |
|                           | week 12  | 3  | 22.22 $\pm$ 19.25 | 33.33  | 0.00  | 33.33  |
|                           | week 16  | 3  | 22.22 $\pm$ 19.25 | 33.33  | 0.00  | 33.33  |
| Fear for future health    |          |    |                   |        |       |        |
|                           | baseline | 13 | 46.15 $\pm$ 28.99 | 33.33  | 0.00  | 100.00 |
|                           | week 4   | 12 | 44.44 $\pm$ 35.77 | 33.33  | 0.00  | 100.00 |
|                           | week 8   | 13 | 61.54 $\pm$ 18.49 | 66.67  | 33.33 | 100.00 |
|                           | week 12  | 3  | 44.44 $\pm$ 19.25 | 33.33  | 33.33 | 66.67  |

| EORTC QLQ-PAN26       | visit    | n  | Mean $\pm$ SD     | Median | Min   | Max    |
|-----------------------|----------|----|-------------------|--------|-------|--------|
|                       | week 16  | 3  | 44.44 $\pm$ 19.25 | 33.33  | 33.33 | 66.67  |
| Ability to plan ahead |          |    |                   |        |       |        |
|                       | baseline | 13 | 23.08 $\pm$ 21.01 | 33.33  | 0.00  | 66.67  |
|                       | week 4   | 12 | 25.00 $\pm$ 25.13 | 33.33  | 0.00  | 66.67  |
|                       | week 8   | 13 | 48.72 $\pm$ 32.25 | 66.67  | 0.00  | 100.00 |
|                       | week 12  | 3  | 22.22 $\pm$ 19.25 | 33.33  | 0.00  | 33.33  |
|                       | week 16  | 3  | 33.33 $\pm$ 33.33 | 33.33  | 0.00  | 66.67  |

QoL = quality of life; EORTC = European Organization for Research and Treatment of Cancer; QLQ-PAN = Quality of Life Questionnaire in patients with pancreatic cancer; ITT = intention-to-treat; PP = per-protocol.
